# Supplementary material for: Detection and sequence analysis of Canine morbillivirus in multiple species of the Mustelidae family
Source: Springer Nature journal article supplement (doi:10.1186/s12917-022-03551-7), 2022-12-24
Supplement: MOESM1 [file 12917_2022_3551_MOESM1_ESM.pdf]

**Supplementary Table 1** Sample numbers of Mustelids tested for *Canine morbillivirus* virus in Hungary. The years 1998, 1999, 2001, 2013, 2014 and 2015 are not included in the table, there was no sample from these years.

|                       | Steppe polecat | European polecat | Stone marten | Pine marten | Least weasel | Stoat      |
|-----------------------|----------------|------------------|--------------|-------------|--------------|------------|
| 1997                  | -              | -                | 1            | -           | -            | -          |
| //                    |                |                  |              |             |              |            |
| 2000                  | -              | -                | -            | -           | 1            | -          |
| //                    |                |                  |              |             |              |            |
| 2002                  | -              | -                | -            | -           | 2            | -          |
| 2003                  | -              | -                | 1            | -           | -            | -          |
| 2004                  | -              | -                | 4            | -           | -            | -          |
| 2005                  | -              | 1                | -            | -           | 1            | -          |
| 2006                  | -              | -                | 4            | -           | 1            | 1          |
| 2007                  | -              | 1                | 8/1          | -           | 1            | -          |
| 2008                  | 2              | 1                | 1            | -           | 2            | -          |
| 2009                  | -              | 1                | 2            | -           | -            | -          |
| 2010                  | 1              | -                | -            | -           | -            | -          |
| //                    |                |                  |              |             |              |            |
| 2012                  | -              | -                | 1            | -           | -            | -          |
| 2014                  | -              | -                | -            | 2           | -            | -          |
| 2016                  | 2              | -                | -            | -           | -            | 1          |
| 2017                  | 3              | 3                | -            | -           | 1            | -          |
| 2018                  | 10/1           | 5                | 2            | 2           | -            | 1          |
| 2019                  | 8              | 11/1             | 1            | 2           | 1            | 1          |
| 2020                  | 12             | 4                | 5/1          | 5           | -            | -          |
| 2021                  | 18/1           | 7                | 5            | 5           | -            | 2          |
| 2022                  | 8              | 2                | 1            | 2           | -            | -          |
| <b>Total/Positive</b> | <b>64/2</b>    | <b>36/1</b>      | <b>36/2</b>  | <b>18/0</b> | <b>10/0</b>  | <b>6/0</b> |

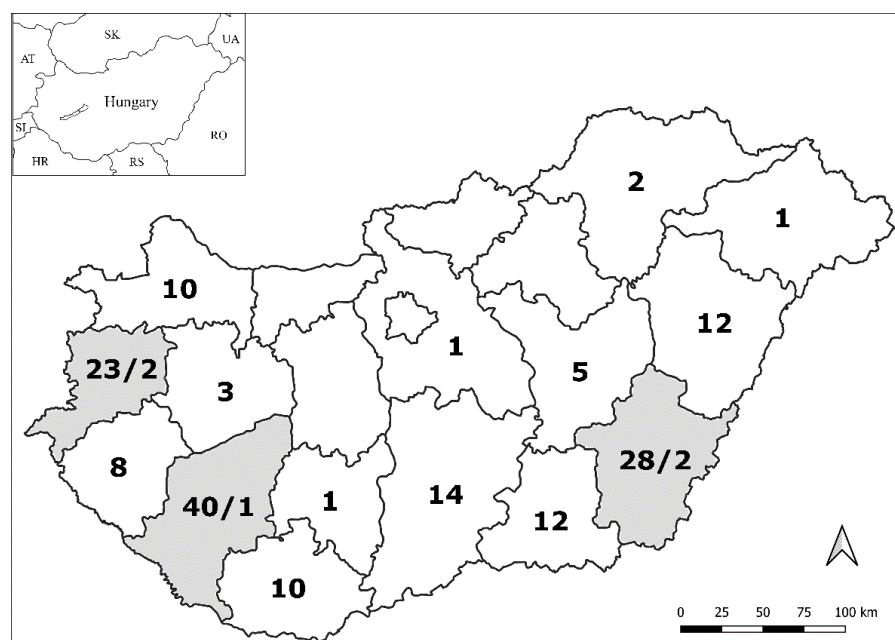

**Supplementary Fig. 1** Regional breakdown of the sample numbers, in Hungary (Total/Positive).

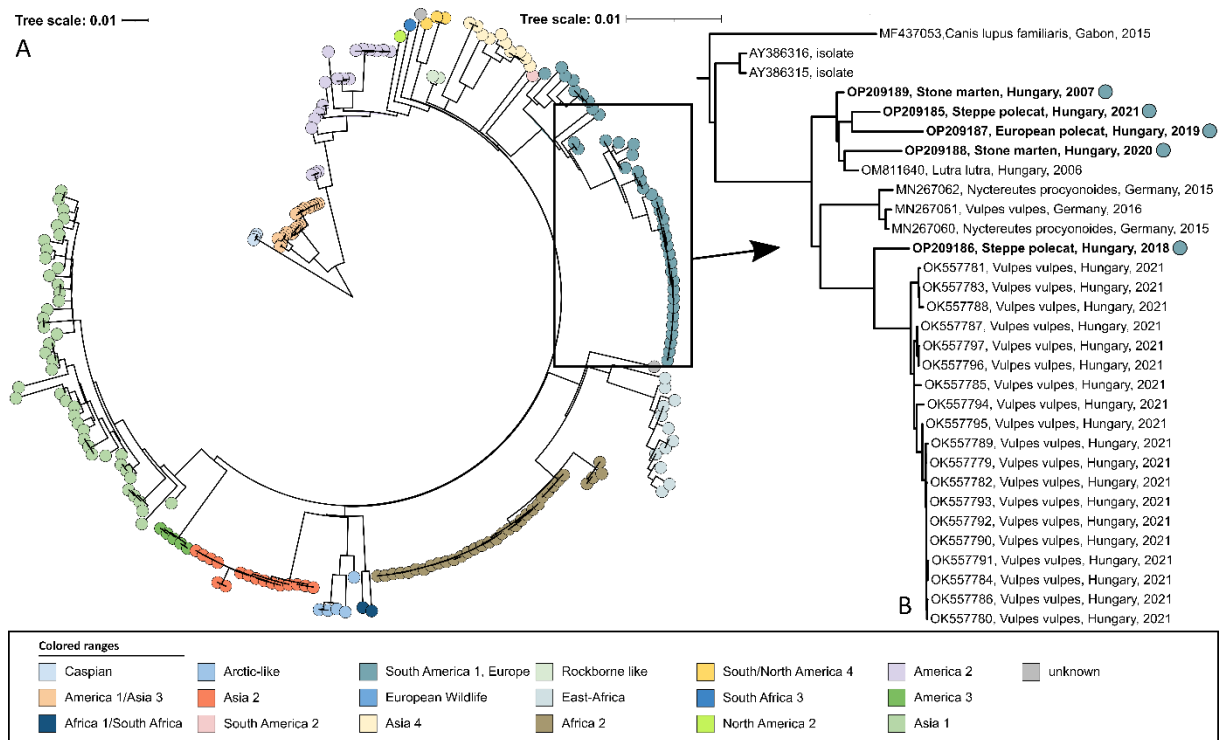

**Supplementary Fig. 2** (A) Maximum likelihood phylogenetic tree based on 221 CDV complete genomes, using the **Randomized Axelerated Maximum Likelihood (RAXML)** tool. Phocine distemper virus (PDV) (GenBank accession number: KY629928) was used as an outgroup to root the phylogenetic tree. The Europe/South America 1 lineage of interest is highlighted in blue. (B) Expanded portion of Europe/S Am 1 lineage. Dots represent sequences obtained in this study.

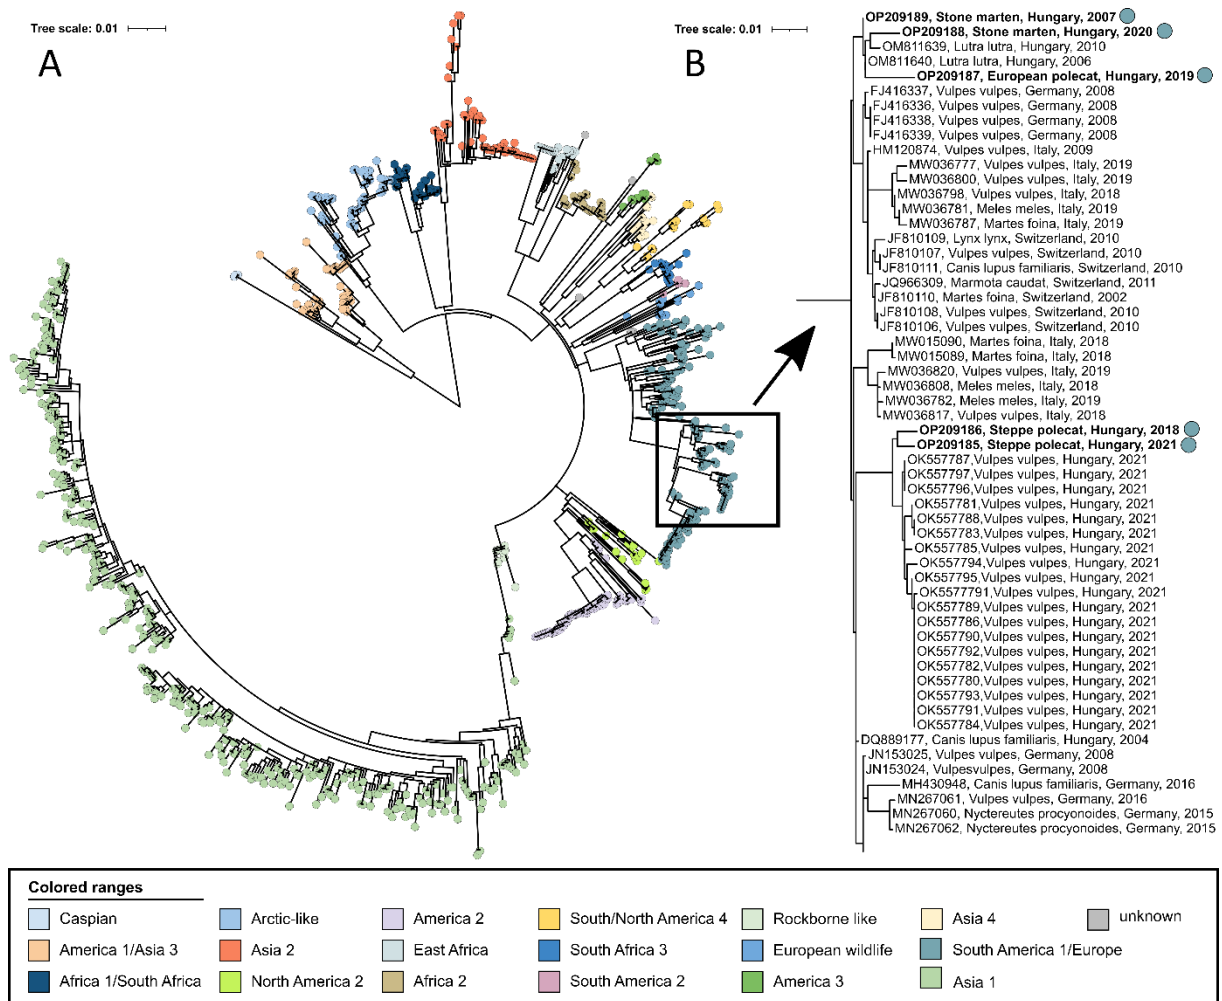

**Supplementary Fig. 3** (A) Maximum Likelihood phylogenetic tree based on 969 complete Hemagglutinin (H) nucleotide sequences, using the **Randomized Axelerated Maximum Likelihood (RAXML)** tool. Phocine distemper virus (PDV) (GenBank accession number: KY629928) was used as an outgroup to root the phylogenetic tree. The Europe/South America 1 lineage of interest is highlighted in blue. (B) Expanded portion of Europe/S Am 1 lineage. Dots represent sequences obtained in this study.

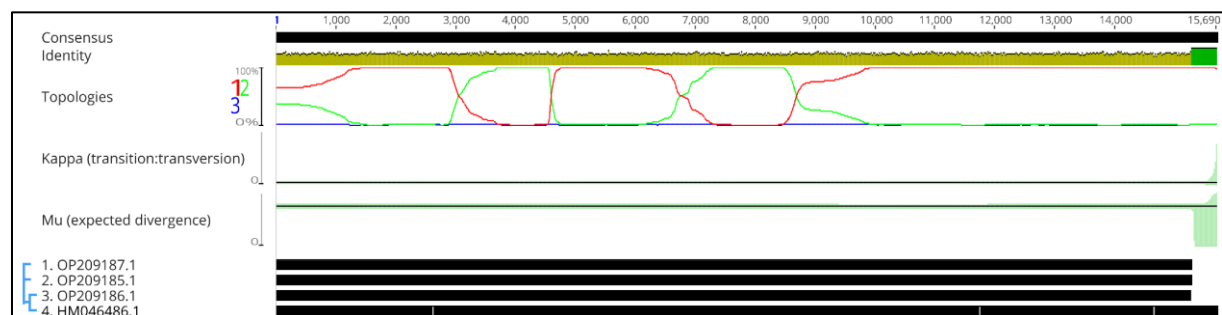

**Supplementary Fig. 4** Recombination analysis of the canine distemper virus (OP209185) with Geneious Prime® 2022.2.2. program, DualBrothers plugin. A CDV isolate, HM046486 (Caspian lineage), was used as an outgroup in all analyses. The y-axis indicates the percentage of identity with a window length 200 bp and a step size of 10 bp.
